# Supplementary material for: Voltammetric Determination of Rhodamine B Using a ZIF-67/Reduced Graphene Oxide Modified Electrode
Source: Hindawi journal article supplement (doi:10.1155/2020/4679061), 2020-06-03
Supplement: f1 [file 4679061.f1.docx]

**Figure S1**. a) DPV curves of 21.1 µg/L RhB in 0.1 M BR-BS pH 7 and b) anodic peak current (*I*p) at different accumulation potentials.

**Figure S2**. a) DPV curves of 21.1 µg/L RhB in 0.1 M BR-BS pH 7 and b) anodic peak current (*I*p) at different accumulation times.

**Figure S3**. a) DPV curves of 21.1 µg/L RhB in 0.1 M BR-BS pH 7 and b) anodic peak current (*I*p) at different pulse amplitudes.

**Figure S4**. a) DPV curves of 21.1 µg/L RhB in 0.1 M BR-BS pH 7 and b) anodic peak current (*I*p) at different rating potentials.

.

**Figure S5**. DPV curves measured successively for nine times at 5.7; 21.1 and 44.1 µg/L RhB.
